# Supplementary material for: A Robust, Tough and Multifunctional Polyurethane/Tannic Acid Hydrogel Fabricated by Physical-Chemical Dual Crosslinking
Source: MDPI journal article supplement (doi:10.3390/polym12010239), 2020-01-19
Supplement: s1 [file s1]

Supporting Information

# A Robust, Tough and Multifunctional Polyurethane/Tannic Acid Hydrogel by Physical-Chemical Dual Crosslinking

Jie Wen <sup>1</sup>, Xiaopeng Zhang <sup>1</sup>, Mingwang Pan <sup>1,2,\*</sup>, Jinfeng Yuan <sup>1,2</sup>, Zhanyu Jia <sup>1</sup> and Lei Zhu <sup>3</sup>

<sup>1</sup> Institute of Polymer Science and Engineering, School of Chemical Engineering and Technology, Hebei University of Technology, Tianjin 300130, PR China; wenjie0329@126.com (J.W.); xpzhangup@163.com (X.Z.); yuanjf@hebut.edu.cn (J.Y.); 15122410536@163.com (Z.J.)

<sup>2</sup> Hebei Key Laboratory of Functional Polymers, Hebei University of Technology, Tianjin 300130, PR China

<sup>3</sup> Department of Macromolecular Science and Engineering, Case Western Reserve University, Cleveland, Ohio 44106-7202, United States; lxz121@case.edu

\* Correspondence: mwpan@126.com

## 2. Experiment Section

### 2.1. Determination of the water content in TA-PU hydrogels

The water content of as-prepared TA-PU hydrogels was calculated by the following formula:

$$WC = \frac{w_h - w_d}{w_h} \times 100\%$$

where  $w_h$  is the mass of as-prepared TA-PU hydrogel,  $w_d$  is the mass of corresponding dry gel.

The water content of TA-PU(S) hydrogels was obtained using the following formula:

$$WC = \frac{w_h - w_d}{w_h} \times 100\%$$

where  $w_h$  is the mass of TA-PU(S) hydrogel,  $w_d$  is the mass of corresponding dry gel.

### 2.2. Determination of the TA content in hydrogels

The TA content of as-prepared TA-PU hydrogel was calculated by the following formula:

$$TC = \frac{w_{TA}}{w_h} \times 100\% = \frac{w - w_0}{w_h} \times 100\%$$

where  $w_h$  is the mass of as-prepared PU-TAx hydrogel,  $w$  is the mass of corresponding dry gel.  $w_0$  is the mass of porous dry gel before immersing in TA solution.

The TA content of PU-TAx(S) hydrogel was obtained using the following formula:

$$TC = \frac{w_{TA}}{w_h} \times 100\% = \frac{w - w_0}{w_h} \times 100\%$$

where  $w_h$  is the mass of PU-TAx(S) hydrogel,  $w$  is the mass of corresponding dry gel.  $w_0$  is the mass of porous dry gel before immersing in TA solution.

### 2.3. Healing percentage of PU-TAx(S) hydrogels

Healing percentage of PU-TAx(S) hydrogels was obtained by the following formula:

$$\text{Healing Percentage (\%)} = \frac{\text{sample strength after healing (MPa)}}{\text{pristine sample strength (MPa)}} \times 100\%$$

### 2.4. Swelling ratio of PU-TAx(S) hydrogels

$$S = \frac{m_s - m_d}{m_d} \times 100\%$$

where  $m_d$  and  $m_s$  are the mass of dry and swollen samples, respectively.

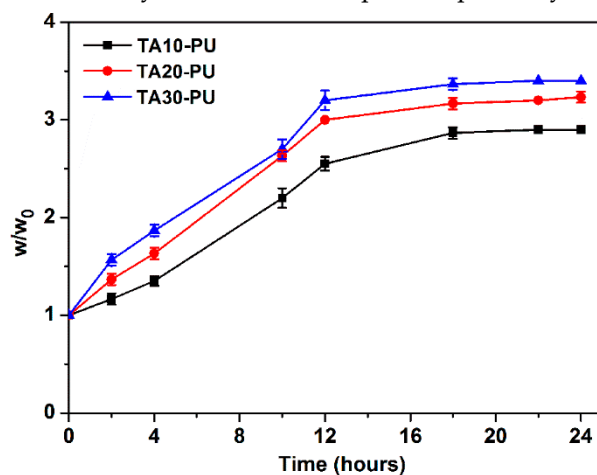

**Figure S1.** Variation of mass ratio with immersing time of porous PU hydrogels in different TA solutions. Error bars indicate standard deviation; N = 3.

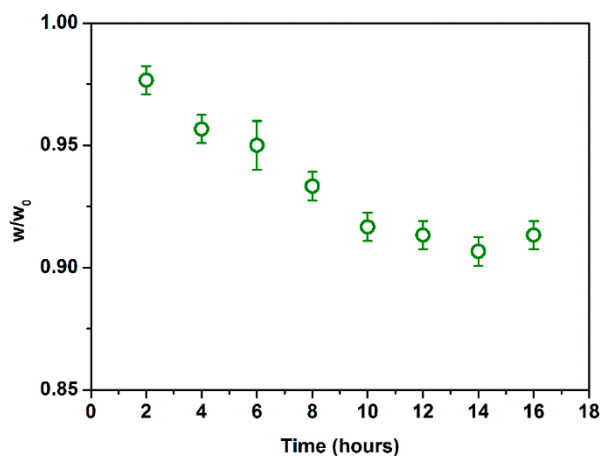

**Figure S2.** Variation of mass ratio with immersing time of porous TA10-PU hydrogel in distilled water. Error bars indicate standard deviation; N = 3.

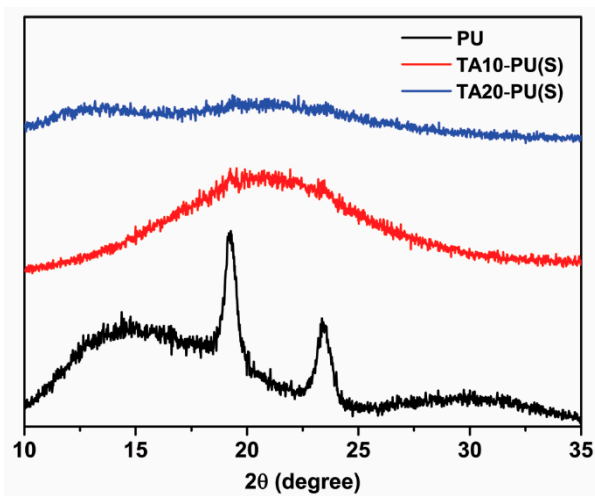

**Figure S3.** XRD graphs of PU and TAx-PU(S) dry gels.

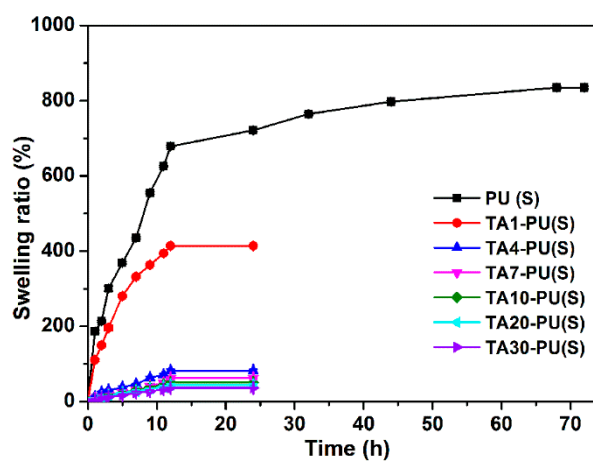

Figure S4. Swelling curves of PU(S) and TAx-PU(S) hydrogels.

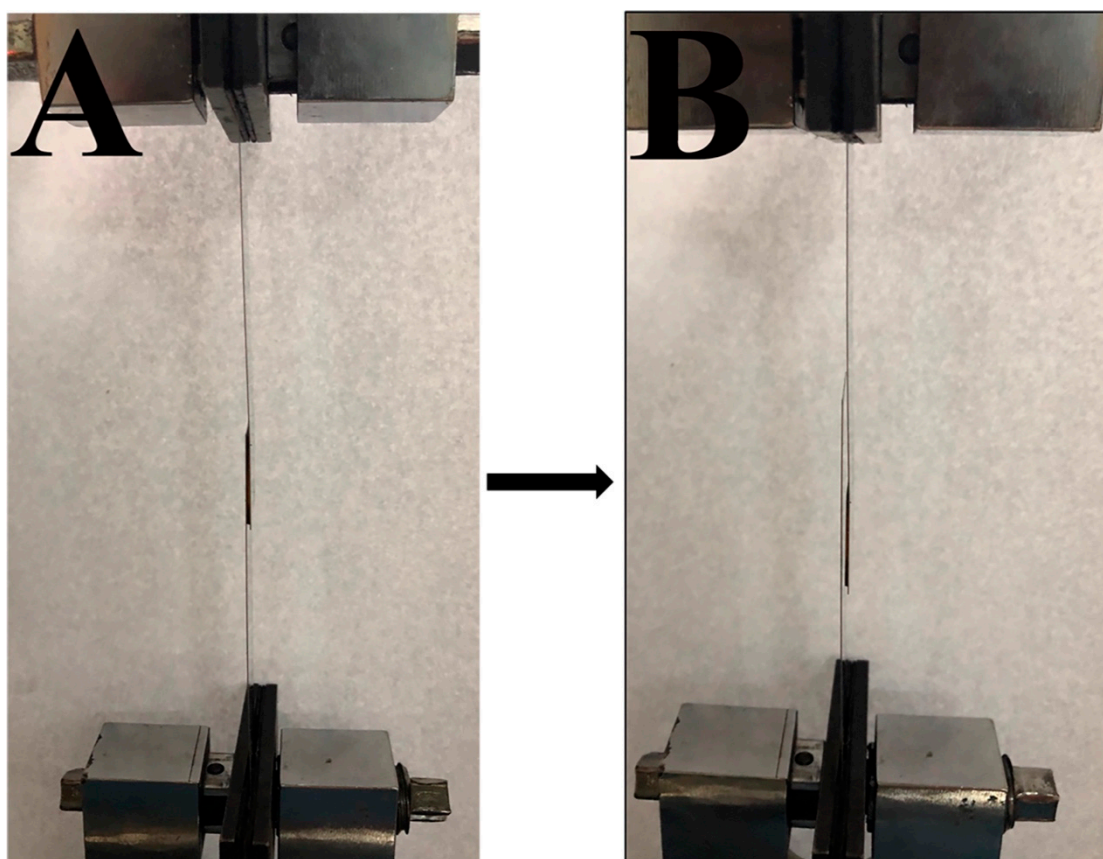

Figure S5. Images of adhesion test of TA30-PU(S) hydrogel.

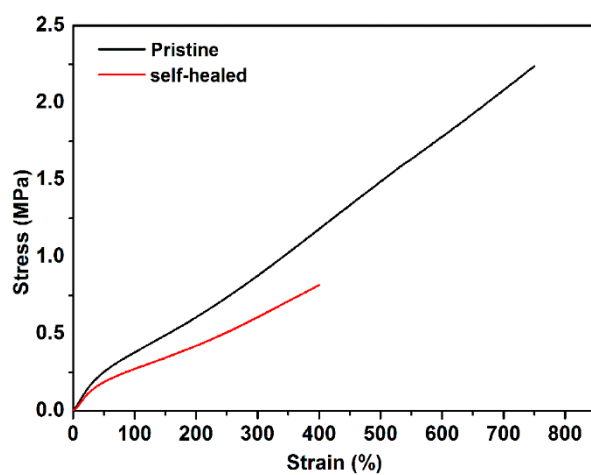

**Figure S6.** Tensile stress-strain curves of pristine and self-healed TA30-PU(S) hydrogels.

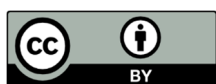

© 2020 by the authors. Licensee MDPI, Basel, Switzerland. This article is an open access article distributed under the terms and conditions of the Creative Commons Attribution (CC BY) license (<http://creativecommons.org/licenses/by/4.0/>).
